# Supplementary material for: One dimensional lead-free (K,Na)NbO3 nanostructures for a flexible self-powered sensor
Source: Royal Society of Chemistry journal article supplement (doi:10.1039/c9dt00354a), 2019-01-01
Supplement: c9dt00354a1.pdf [file c9dt00354a1.pdf]

## Supplementary Information

### One dimensional lead-free (K,Na)NbO<sub>3</sub> nanostructures for a flexible self-powered sensor

Li-Qian Cheng,<sup>\*ab</sup> Ke Wang<sup>b</sup> and Jing-Feng Li<sup>b</sup>

#### S1. The corona poling

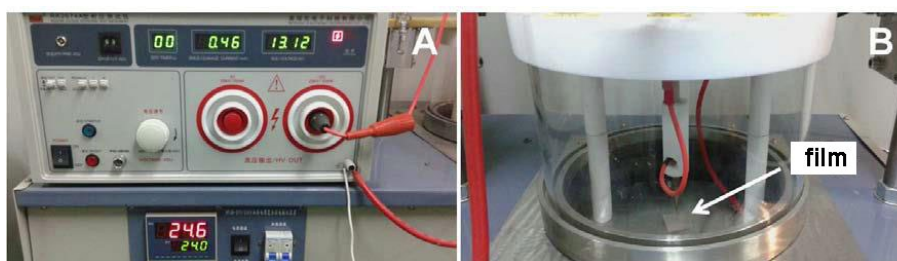

**Fig. S1** (A) High voltage supply and (B) the poling equipment, together with a piece of film.
